# Supplementary material
Source: publisher site journal article supplement (https://www.degruyterbrill.com/publication/journal_key/ARH/downloadAsset/ARH_CFP_Rheology%20of%20geomaterials%20and%20engineered%20materials.pdf)
Supplement: Supplementary file 1 [file ARH_CFP_Rheology%20of%20geomaterials%20and%20engineered%20materials.pdf]

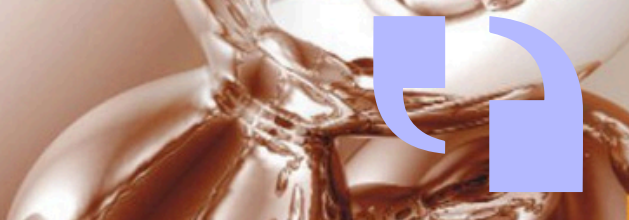

# RHEOLOGY OF GEOMATERIALS AND ENGINEERED MATERIALS UNDER EXTREME CONDITIONS: MULTISCALE CHARACTERIZATION, MODELING AND APPLICATIONS

## GUEST EDITOR

Prof. Dr. Yixian Wang, School of Civil Engineering, Hefei University of Technology, Hefei 230009, China

Dr. Panpan Guo, School of Civil Engineering, Hefei University of Technology, Hefei 230009, China

Dr. Hui Zhang, School of Civil Engineering, University College Dublin, Dublin, Ireland

Dr. Jian Liu, School of Engineering and Architecture, University College Cork, Cork, Ireland

## DESCRIPTION

Extreme mechanical and environmental conditions demand fundamental advances in the rheological science of complex materials. This special issue focuses on the rheology of geomaterials (soils, rock masses, fault gouge) and engineered materials (grouts, concrete, tailings) under extreme conditions such as high pressure, temperature, and shear. We seek contributions where multiscale characterization, modeling, and novel rheometry decode flow/deformation mechanisms, with explicit linkage to material behavior in challenging environments. Rheology must be the core subject of investigation, not merely a supplementary tool.

### **Scope and Topics of Interest:**

- Microstructural rheology of soil stabilizers and grouts: Yielding/thixotropy mechanisms under extreme confinement.
- Non-Newtonian dynamics in particulate suspensions: Jamming, adsorption, and flow cessation.
- Viscoelasticity-driven design of composites: Thixotropic models for stability and flow control.
- Advanced rheometry: High-Pressure/Temperature systems, rough interfaces, and in-situ monitoring.
- Multiscale constitutive modeling: Bridging particle dynamics to macroscale deformation.
- Yield stress and viscoelasticity as master variables for durability.
- Rheophysics of pastes: Pressure-temperature coupling in cohesive materials

# PUBLICATION SCHEDULE / HOW TO SUBMIT

**Submission Deadline: 30 June 2026**

The authors are kindly invited to register at [our paper processing system](#) and submit their contribution (both original papers or reviews are welcome) using a special track established for this special issue: Section/Category – “SI:Rheology of Geomaterials”. All manuscripts will undergo the standard peer-review process (single-blind, at least two independent reviewers) and will be treated in the same way as other regular articles (indexing, abstracting, immediate publication, etc.). Instructions for authors are available [here](#).

In case of any questions please contact Applied Rheology Managing Editor:  
**Małgorzata Komadowska** ([malgorzata.komadowska@degruyterbrill.com](mailto:malgorzata.komadowska@degruyterbrill.com))
